# Supplementary material for: Trends in the treatment of urinary stone disease in Turkey
Source: PeerJ. 2018 Jul 31;6:e5390. doi: 10.7717/peerj.5390 (PMC6074772; doi:10.7717/peerj.5390)
Supplement: Supplemental Information 1 [file peerj-06-5390-s001.xlsx]

## Sheet: Sheet1
Q1	Q 2	Q3	Q4	Q5-ESWL	Q5 Semirigit URS	Q5 Flexible urs	Q5 pnl	Q5 laparoscopy	Q6	Q7	Q8	Q9	Q 10	Q 11	Q 12	Q 13	Q 14
10	2	2	30	2	1	2	1	2	2	2	1	4	4	1	3	2	1
8	2	2	30	1	1	1	1	1	1	1	1	4	3	1	3	2	1
6	2	2	5	2	1	2	1	2	2	3	1	4	3	1	3	2	1
6	2	2	10	2	1	2	1	2	2	2	2	4	4	2	3	2	1
6	2	2	70	2	1	2	1	1	1	3	3	4	4	1	3	2	1
6	2	2	15	2	1	2	1	1	2	1	1	4	3	1	3	2	1
6	2	2	20	2	1	2	2	1	2	2	1	4	4	2	3	2	3
6	2	2	40	2	1	2	1	2	1	3	1	4	3	1	3	2	3
6	2	2	15	2	1	2	2	2	1	2	1	4	4	1	3	2	3
6	2	2	10	2	1	2	1	1	1	1	1	4	3	2	3	2	4
6	2	2	10	2	1	1	1	2	1	1	2	4	4	2	3	2	4
7	2	2	20	1	1	1	1	1	2	2	1	4	4	1	3	2	1
7	2	2	30	2	1	2	1	1	1	1	1	4	3	1	3	2	1
7	2	2	10	2	1	2	2	2	1	1	1	4	4	1	3	2	1
7	2	2	40	1	1	1	1	1	2	2	2	4	4	2	3	2	1
7	2	2	40	1	1	1	1	1	2	2	2	4	4	2	3	2	1
7	2	2	35	1	1	1	1	1	2	3	2	4	4	2	3	2	1
7	2	2	20	1	1	1	1	2	1	3	1	4	4	1	3	2	1
7	2	2	10	2	1	2	2	2	1	1	1	4	4	2	3	2	3
7	2	2	30	2	1	2	2	2	2	2	1	4	3	2	3	2	3
7	2	2	30	2	1	2	2	2	2	3	1	4	4	1	3	2	3
7	2	2	30	2	1	2	1	1	1	1	1	4	3	3	3	2	4
8	2	2	30	1	1	1	1	2	2	3	2	4	4	2	3	2	1
8	2	2	25	1	1	2	2	1	1	1	1	2	3		3	2	4
10	2	2	30	2	1	1	1	2	3	3	3	4	4	2	3	2	3
10	2	2	30	1	1	2	2	2	1	1	1	4	3	1	3	2	4
10	2	2	30	1	1	1	2	2	1	2	1	4	3	2	3	2	4
11	2	2	10		1	2	2	2	1	3	3	4	1	1	3	2	1
11	2	2	20	1	1	1	1	2	1	3	1	4	4	1	3	2	1
12	2	2	35	1	1	2	1	2	2	1	1	4	3	2	3	2	1
12	2	2	20	1	1	2	2	2	1	1	1	4	3	1	3	2	3
12	2	2	20	2	1	1	2	2	1	1	1	4	3	1	3	2	4
13	2	2	10	2	1	2	2	2	2	2	2	4	4	2	3	2	3
15	2	2	40	2	1	2	2	2	1	1	1				3	2	3
17	2	2	10			1		2		3	1	1	3	1	3	2	3
19	2	2	20	1	1	2	1	2	2	3	1	4	4	2	3	2	3
21	2	2	15	1	1	2	2	2	2	2	1	3	4	2	3	2	3
26	2	2	30		1	2			2	3	1	4	4	2	3	2	1
30	2	2	10	1	1	2	1	1	1	3	1	4	3	2	3	2	1
30	2	2	25	1	1	2	2	2	3	3	3	1	1	1	1	2	1
37	2	2	50	1	1	2	2	2	1	1	1	4	3	1	2	2	3
10	2	2	35	2	1	2	1	2	2	2	1	4	3	1	3	2	1
9	2	2		1	2	1	2	1	1	3	1	5	3	1	3	2	1
8	2	2	30	2	1	2	2	2	1	1	1	2	3	1	3	2	3
8	2	2	25	1	1	22	2	1	1	1	1	4	4	2	3	2	3
10	3	2	15	2	1	2	2	2	2	3	1	4	3	1	3	2	3
5	3	1	40	2	1	1	1	1	1	2	1	4	4	1	3	2	1
5	3	1	40	1	1	1	1	1	2	2	2	3	4	2	3	2	3
6	3	2	60	2	1	1	1	2	2	3	2	4	4	1	3	2	1
6	3	2	40	1	1	2	1	2	2	3	1	4	3	1	3	2	3
6	3	2	40	1	1	1	1	1	1	3	1	4	4	1	3	2	3
6	3	2	20	2	1	1	1	2	1	1	1	4	3	1	3	2	3
7	3	2	40		1	2	2	2	1	1	1	4	3	1	3	2	4
7	3	2	15	1	1	1	1	1	2	2	2	4	4	2		2	1
7	3	2	35	1	1	1	1	1	2	2	1	4	3	1	3	2	3
7	3	2	15		1	1	1	2	2	3	3	4	3	1	3	2	3
7	3	2	75	1	1	1	1	2	1	2	1	4	4	2	3	2	3
8	3	2	60	1	1	1	1	2	2	2	1	3	3	2	3	2	1
8	3	2	20	1	1	1	1	2	2	1	3	4	3	1	3	2	1
8	3	2	30	1	1	1	1	2	1	1	1	4	3	1	3	2	3
8	3	2	40	1	1	2	1	2	2	2	1	4	3	1	3	2	3
9	3	2	15	1	1	1	1	1	1	1	1	4	4	1	3	2	1
10	3	2	30	1	1	1	1	1	1	2	2	4	3	1	2	1	3
10	3	2	30	2	1	1	1	1	1	2	1	4	4	2	3	2	3
11	3	2	20	1	1	1	1	1	1	1	1	3	4	1	3	2	1
11	3	2	20	1	1	1	1	2	1	1	1	3	4	2	3	2	3
14	3	2	33	1	1	1	1	1	2	2	1	4	4	1	3	2	1
15	3	2	40	1	1	1	1	1	1	3	1	4	3	1	3	2	3
15	3	2	5	1	1	1	1	2	1	1	2	4	4	1	3	2	3
15	3	4	25	1	1	1	1	1	1	3	1	4	4	1	3		1
16	3	3	30		1	1	1	1	2	2	1	4	3	1	3	2	1
16	3	4	20	1	1	1	1	1	2	3	3	4	4	1	3	2	1
17	3	2	50	1	1	1	1	2	2	2	2	4	4	1	3	2	1
22	3	2	30		1	1	1	1	1	3	1	4	5	2	3	2	1
24	3	4	30	1	1	1	1	1	2	2	2	4	5	2	3	2	1
24	3	5	30	1	1	1	1	2	2	3	1	4	4	2	2	2	1
25	3	5	20	2	1	2	1	2			3	4	4	2	3	2	4
35	3	5	40	1	1	1	1	1	2	3	1	4	3	1	3	1	3
6	3	2	30	1	1	1	1	1	2	2	1	4	3	2	3	2	1
7	3	2	35	1	1	1	1	1	2	2	2	4	4	2	3	2	1
8	3	2	50	2	1	1	1	2	2	2	1	4	4	1	3	2	3
9	4	2	25	1	1	2	2	2	1	1	1	4	5	1	4	2	1
7	4	2	30	1	1	1	1	1	2	2	2	4	4	2	3	2	1
7	4	2	30	1	1	2	1	2	2	2	2	4	4	2	3	2	1
7	4	2	35	2	1	2	1	2	2	3	1	4	3	1	3	2	3
7	4	3	20	2	1	1	1	1	1	2	2	4	3	1	3	2	1
8	4	2	30	2	1	1	2	2	2	2	2	4	4	2	3	2	1
8	4	2	30	1	1	1	1	1	2	2	2	4	4	2	3	2	1
8	4	2	30	1	1	1	1	1	2	2	2	4	4	2	3	2	1
8	4	2	40	1	1		1	2	3	3	1	4	3	1	3	2	1
10	4	2	50		2		2	2	3	3	3	4	4	2	3	2	1
10	4	2	30	1	1	1	2	2	1	1	1	4	3	1	3	2	1
11	4	2	20		1			2	2	2	2	4	4	1	3	2	4
12	4	2	30	1	1		1	2	1	3	1	4	3	1	3	2	4
15	4	2	40	1	1	1	1	2	2	2	2	4	4	2	3	2	1
15	4	2	40		1	1	1	2	2	3	3	4	4	2	3	2	1
15	4	2	70	1	1	1			1	2	2	3	4	1	3	2	1
15	4	2	40	1	1	1	1	2	1	2	2	4	4	1	3	2	1
15	4	2	25	1	1	2	1	2	1	1	1	4	4	1	3	2	4
17	4	2	50		1		1	1	3	3	1	4	5	1	3	2	1
18	4	2	20	2	1	1	1	2	2	3	3	4	3	1	3	2	1
18	4	2	20	2	1	1	1	2	1	3	1	4	3	1	3	2	1
18	4	2	20	1	1			2	1	1	1	4	3	2	3	2	1
18	4	2	10	1	1	1	1	1	1	1	1	4	3	1	2	1	3
19	4		25		1	1		2	2	2	2	2	4	2	3	2	1
20	4	2	30	1	1	1	2		2	3	2	4	4	2	3	2	1
20	4	2	30	1	1	1	1		1		1	4	3	1	3	1	1
20	4	5	20		1	1	1	1	2	2	2	3	4	2	3	2	4
21	4	2	20	1	1	1			2	2	2	3	4	2	3	2	1
22	4	2	60		1		1	2	2	3	2	4	4	2	3	2	1
22	4	2	15		1	1					2	3	4	2	3	2	1
25	4	2	15	2	1	1	2	2	2	2	2	3	4	2	3	2	4
25	4	4	20	1	1				1	2	1	4	3	1	3	2	1
25	4	5		1	1	1	1		1	3	1	4	3	1	3	2	3
26	4	4	20		1	1	1	1	2	3	2	4	4	2	3	2	1
27	4	2	15	1	1	1	2		1	1	2	4	4	2	3	2	1
27	4	2	10	1	1	1	2	2	1	1	1	3	4	2	3	2	1
28	4	2	30						2	3	2	4	4	2	3	2	1
28	4	4	30		1	1	1	2	3	3	3	4	4	2	3	2	3
29	4	5	20		1	1	2		2	2	2	3	4	2	3	2	1
30	4	3	10	1				2	3	3	2	4	3	1	3		1
35	4	4	25		1	1	1	1	2	3	2	4	4	2	3	2	1
35	4	5	20	1	1	2	1	1	1	1	1	4	3	1	3	2	3
37	4	2	5		1				2	1	2	4	3	2	3	2	3
40	4	4	20	1	1	1	1	2	2	3	1	4	4	2	3	2	3
46	4	4	45	1	1		1		1	1	1	2	3	1	3	2
7	4	5	25	1	1	1			2	2	1	3	4	1	3	2	4
12	4	2	40	1	1		1		1	3	1	4	3	1	3	2	1
8	4	2	20	1	1	1	1			3	1	4	4	1	2	2	1
7	4	5	30	1	1	1	1	1	2	2	1	4	4	2	3	2	1
9	4	5	10		1				1	3	1	4	4	1	3	1	3
5	5	1	30	1	1	1	1	1	2	3	1	4	3	1	3	2	1
5	5	1	30		2	2	2		2	2	2	4	4	2	3	2	1
5	5	1	20	1	1	1	1		2	1	1	4	4	1	3	2	1
5	5	1	25	1	1	1	1	2	1	1	1	4	4	1	3	2	3
5	5	1	20	1	1	1	1	1	1	3	3	4	4	2	3	2	3
5	5	1	60	1	1	1	1	1	1	2	2	4	4	1	3	2	3
5	5	1	30	1	1	1	1	1	2	2	3	4	2	1	3	2	3
6	5	3	20	1	1	1	1	1	1	2	1	3	3	1	3	2	4
7	5	2	20	1	1	1	1	1	1	2	1	4	3	2	3	2	1
7	5	3	21	1	1		1	1	1	3	1	4	4	1	3	2	1
7	5	3	35	1	1	1	1	1	2	2	2	4	4	2	3	2	1
8	5	2	30	1	1	1	1	1	3	2	1	4	3	1	3	2	3
8	5	3	15	1	1	1	1		2	3	3	4	4	2	3	2	1
9	5	2	10	1	1	1	1	1	1	3	2	4	3	1	3	2	4
10	5	2	20	1	1	1	1	2	2	2	2	4	4	2	3	2	1
10	5	2	20	1	1	1	1		1	2	1	4	3	1	3	1	3
10	5	3	50	1	1	1	1	1	2	2	1	4	4	1	3	2	1
10	5	4		1	1				3	3	3	4	4	2	3	2	1
11	5	3	30	1	1	1	1	1	1	3	2	4	3	1	3	2	1
11	5	3	60	1	1	1	1	1	1	1	1	4	4	1	3	2	1
11	5	3	30	1	1	2	2	2	1	1	1	1	3	1	2	1	3
12	5	3	20	1	1	1	1	2	2	3	1	4	4	1	3	2	1
12	5	3	25	1	1		1	1	1	3	1	4	2	1	3	2	4
13	5	3	30	2	1	2	1		1	3	1	4	4	1	3	2	1
13	5	3	30	1	1	1	1	1	2	3	3	4	4	1	3	2	1
13	5	3	75	1	1	1	1	1	1	2	1	4	5	1	3	2	3
13	5	3	25	2	1	2	1	2	1	3	1	4	4	1	3	2	3
13	5	4	30	1	1	1	1	1	2	3	1	4	3	1	3	2	1
13	5	4	10	1	1	1	1	1	2	3	1	4	4	2	3	2	3
14	5	3	30	1	1	2	1	2	1	1	1	4	3	1	3	2	1
14	5	4	25	1	1	1	1	2	1	3	1	4	4	1	3	2	1
14	5	4	50	1	1	1	1	1	1	3	1	4	3	1	3	2	1
15	5	4	30	1	2	2	2	2	2	2	1	4	3	1	3	2	1
15	5	4	25	1	1	1	1	1	1	1	3	4	3	1	3	2	1
15	5	4	30	1	1	1	1	2	1	1	1	4	4	1	3	2	1
15	5	4	50	2	1	1	1	2	2	3	2	4	4	2	3	2	3
15	5	4	30	1	1	1	1	2	1	1	1	4	4	2	3	2	3
15	5	4	30	1	1	1	1	2	1	2	2	3	4	1	3	2	4
16	5	4	70	1	1	1	1	1	2	2	2	4	4	2	3	2	1
16	5	4	30	2	1	1	1	1	3	3	3	4	4	2	3	2	1
17	5	4	25		1	2	1	1	1	3	3	4	4	2	3	2	1
17	5	4	25	1	1	1	1	1	1	1	1	4	4	1	3	2	2
18	5	4	40		1	1	1	1	2	3	2	4	4	1	3	2	1
19	5	4	30	2	1	1	1	1	2	2	2	4	4	2	3	2	1
19	5	4	40	1	1	1	1	1	2	1	1	4	3	1	3	2	1
19	5	4	20	2	2	2	2	2	2	2	2	4	4	2	3	2	4
20	5	4	30	2	1	1	1	1	2	2	1	4	4	1	3	2	1
20	5	4	30	2	1	1	1	1	3	2	1	4	4	1	3	2	1
20	5	5	15	1	1	1	1	1	1	3	3	4	4	2	3	1	1
24	5	5	60	1	1	1	1	1	3	2	3	4	2	2	3	2	1
25	5	5	70	1	1	1	1	1	1	3	1	4	3	1	3	1	1
25	5	5	35	1	1	1	1	1	1	3	1	4	4	1	3	2	1
25	5	5	20	1	1	1	1	1	2	3	1	4	4	2	3	2	1
27	5	5	30	1	1	1	1	1	2	2	1	4	4	2	3	2	1
31	5	5	25	1	1	1	1	1	1	3	1	4	4	1	3	2	1
36	5	5	20	1	1	1	1	1	1	2	1	4	3	1	3	1	1
36	5	5	15	1	1	1	1	1	1	3	1	4	3	1	3	2	3
40	5	5	15	1	1	1	1	1	2	3	1	4	5	2	3	2	1
40	5	5	20	2	1	1	1	2	2	2	2	2	4	2	3	2	3
40	5	5	20	2	2	1	1	2	1	3	2	4	2	2	3	2	3
42	5	5	10	1	1	1	1	1	1	1	1	4	4	2	3	2	1
42	5	5	10	1	1	1	1	2	1	1	1	4	3	2	3	2	1
25	5	2	20	1	1	2	1	2	1	1	1	4	4	1	3	2	1
12	5	2	30	1	1	1	1	2	1	2	1	4	4	1	3	2	3
15	5	4	50	1	1	1	1	1	3	3	3	4	4	2	3	2	1
12	5	4	40	1	1	1	1	1	1	1	1	4	4	1	3	2	1
27	5	5	50	1	1	1	1	1	1	3	1	4	4	1	3	2	3
25	5	5	20	1	1	1	1	2	1	2	1	4	4	1	3	2	3
30	5	5	20	1	1	1	1	1	1	1	1	4	3	1	2	1	4
35	5	5	40	1	1	1	1	1	2	3	2	4	3	2	3	2	4
7	2	2	20	1	1	1	1	1	2	2	1	4	4	1	3	2	1
7	2	2	30	2	1	2	1	1	1	1	1	4	3	1	3	2	1
15	3	2	40	1	1	1	1	1	1	3	1	4	3	1	3	2	3
